# Supplementary material
Source: publisher figshare collection journal article supplement (https://wiley.figshare.com/articles/dataset/_/3520067)
Supplement: Supplementary file 1 [file 1 › appendix-C.htm]

Ecological Archives A024-222-A3


*Ecological Archives* A024-222-A3

S. J. Williams, J. P. G. Jones, R. Annewandter, J. M. Gibbons. 2014. Cultivation can increase harvesting pressure on overexploited plant populations. *Ecological Applications* 24:2050–2062. http://dx.doi.org/10.1890/13-2264.1

Appendix C. Sensitivity analysis.

> View / download PDF.


---

[Back to A024-222]
